# Supplementary material for: Butyric Acid from Probiotic Staphylococcus epidermidis in the Skin Microbiome Down-Regulates the Ultraviolet-Induced Pro-Inflammatory IL-6 Cytokine via Short-Chain Fatty Acid Receptor
Source: PubMed Central journal article supplement (PMC6769796; doi:10.3390/ijms20184477), 2019-09-11
Supplement: ijms-20-04477-s001.pdf [file ijms-20-04477-s001.pdf]

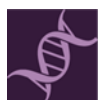

1 Article

2 **Butyric acid from probiotic *Staphylococcus epidermidis***  
3 **in the skin microbiome down-regulates the ultraviolet-**  
4 **induced pro-inflammatory IL-6 cytokine via short-**  
5 **chain fatty acid receptor**

6 Sunita Keshari<sup>1</sup>, Arun Balasubramaniam<sup>2</sup>, Bideriya Myagmardoolonjin<sup>2</sup>, Deron Raymond Herr<sup>3</sup>,  
7 Indira Putri Negari<sup>2</sup> and Chun-Ming Huang<sup>2,4,\*</sup>

8

9 <sup>1</sup> Department of Life Sciences, National Central University, Taoyuan 32001, Taiwan;

10 [sunitakeshari827@gmail.com](mailto:sunitakeshari827@gmail.com)

11 <sup>2</sup> Department of Biomedical Sciences and Engineering, National Central University, Taoyuan 32001, Taiwan;

12 [arunb2895@gmail.com](mailto:arunb2895@gmail.com); [binderya.smile@yahoo.com](mailto:binderya.smile@yahoo.com) [indiraputri24@ncu.edu.tw](mailto:indiraputri24@ncu.edu.tw)

13 <sup>3</sup> Department of Pharmacology, National University of Singapore, Singapore 117600, Singapore;

14 [phcdrh@nus.edu.sg](mailto:phcdrh@nus.edu.sg)

15 <sup>4</sup> Department of Dermatology, School of Medicine, University of California, San Diego, CA 92093, USA

16 \* Correspondence: [chunming@ncu.edu.tw](mailto:chunming@ncu.edu.tw) Tel: +886-3-422-7151 (ext. 36101); Fax: +886-3-425-3427

17

18 1. Supplementary Information

19

20 1.1. Western Blotting

21 Mouse dorsal skin was collected after 4 weeks of UVB exposure and were lysed with T-PER™ Tissue  
22 Protein Extraction Reagent (ThermoFisher Scientific, Waltham, MA, USA) supplemented with an  
23 EDTA-Free protease inhibitor cocktail (Sigma-Aldrich). Tissue lysates (20 µg) were subjected to 10%  
24 sodium dodecyl sulfate polyacrylamide gel electrophoresis gel (SDS-PAGE), then transferred to a  
25 polyvinylidene difluoride (PVDF) membrane (Millipore, Temecula, CA, USA) and blocked with 5%  
26 (w/v) non-fat milk before incubation overnight with primary antibodies to FFAR2 (1:1,000, Protein  
27 Tech,) and β-actin (1:1,000, Cusabio). This was followed by treatment with horseradish peroxidase  
28 (HRP)-conjugated secondary antibody (goat anti-rabbit or anti-mouse (1:5,000), ThermoFisher  
29 Scientific) for 1 h. Protein bands were detected with a chemiluminescent detection reagent  
30 (ThermoFisher Scientific) and Omega Lum™ C Imaging System (Gel company, San Francisco, CA,  
31 USA). Densitometry analysis of protein bands were conducted using ImageJ software.

32

33 2.2 Real Time PCR

34 RNA (100 ng) was converted into cDNA using an iScript cDNA Synthesis Kit (Bio-Rad, Hercules, CA,  
35 USA). All sets were designed using National Center for Biotechnology Information (NCBI) Primer-Blast  
36 (<https://www.ncbi.nlm.nih.gov/tools/primerblast/>). The reaction was performed on StepOnePlus Real-  
37 Time PCR System (Thermo Fisher Scientific) using Power SYBRGreen PCR Master Mix (Thermo Fisher  
38 Scientific). The reaction conditions for 40 cycles are as follows: 95°C for 10 min followed by 95°C for 15  
39 s, 55°C for 60 s, and 72°C for 30 s. All reactions were carried out with 3 biological replicates, and each  
40 analysis consists of 3 technical replicates. The expression of GAPDH gene was used for normalization.  
41 The levels of relative expression levels were calculated using the cycle threshold ( $2^{-\Delta\Delta Ct}$ ) method.  
42 Primers used for FFAR2 and GAPDH were 5'- ACCCAAGAGCAGCTGGATGT-3' (forward); 5'-  
43 AGCGCCAATAACAGAAGATGGT-3' (reverse) and 5'-TGTGTCCGTCGTGGATCTGA-3' (forward);  
44 5'-GATGCCTGCTTACCACCTT-3' (reverse) respectively.

45

46  
47  
48  
49  
50  
51  
52  
53  
54  
55  
56  
57  
58  
59  
60  
61  
62  
63  
64  
65  
66  
67  
68  
69

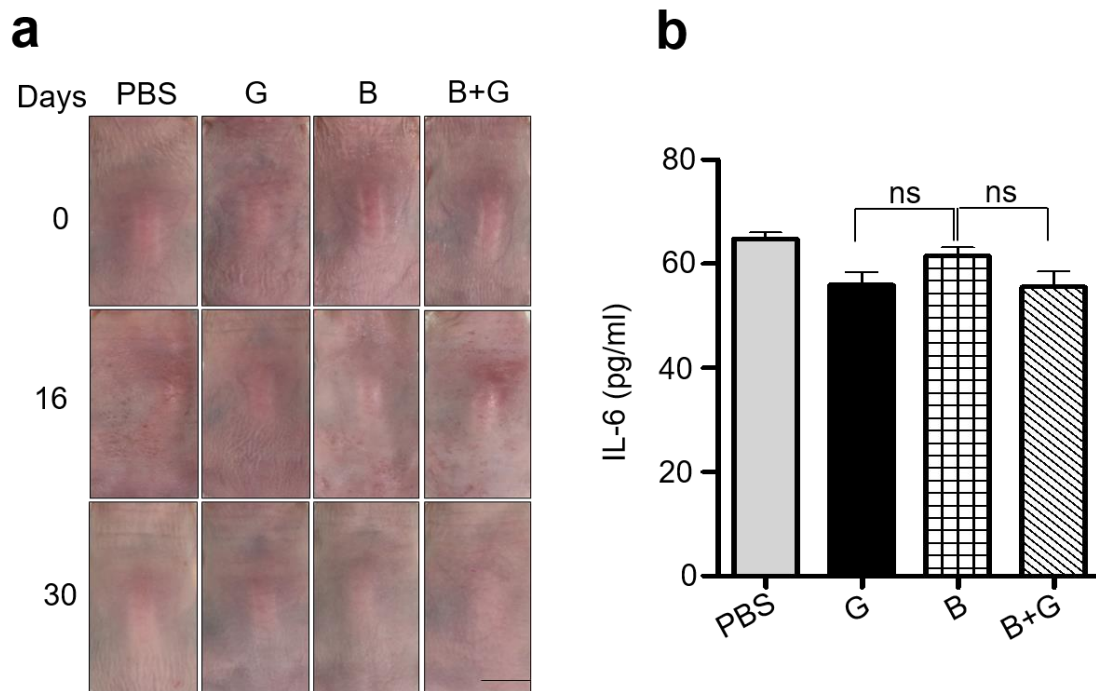

70  
71  
72  
73  
74  
75  
76  
77  
78  
79  
80  
81  
82  
83

**Figure S1.** Skin morphology and IL-6 level in mice skin upon application of a mixture of *S. epidermidis* and glycerol. (a) Skin morphology of ICR mice, topically applied with PBS, glycerol (G) (2%), *S. epidermidis* bacteria (B) ( $10^7$  CFU/ml), or mixture of *S. epidermidis* bacteria plus glycerol (B+G) without UVB-irradiation as a control for UVB irradiated groups. Scale bar = 5 mm. Graph (b) indicates the level of IL-6 in skin (c) from above all groups of ICR mice was quantified using a mouse IL-6 enzyme-linked immunosorbent assay (ELISA) kit (R&D Systems). Data are the means of three individual experiments using five mice per group. ns = non-significant. \*\*\*  $p < 0.001$ . (two-tailed t-tests).

84  
85  
86  
87  
88  
89  
90  
91  
92  
93  
94  
95  
96  
97  
98  
99  
100  
101  
102  
103  
104  
105  
106  
107  
108  
109  
110  
111  
112  
113  
114  
115  
116

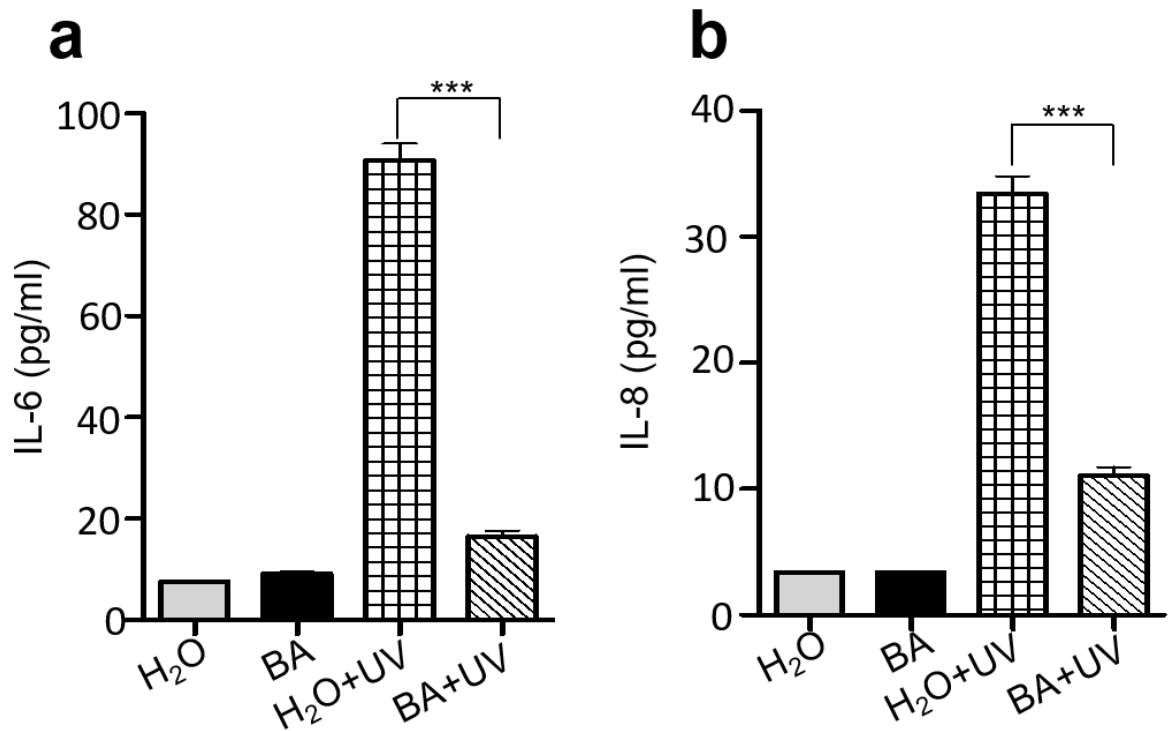

**Figure S2.** The effect of BA (butyric acid) on IL-6 and IL-8 production in UVB irradiated and non-irradiated human keratinocytes (CCD 1106 KERTr). Human keratinocytes irradiated with UVB (195 mJ/cm<sup>2</sup>) or non-irradiated were incubated in the presence or absence of BA (butyric acid) (4 mM) for 12 h. The level of IL-6 (a) and IL-8 (b) from the supernatants of human keratinocytes were detected using an ELISA. Data are the means of three separate experiments using five mice per group. \* p < 0.01. (two-tailed t-tests).

117  
 118  
 119  
 120  
 121  
 122  
 123  
 124  
 125  
 126  
 127  
 128  
 129  
 130  
 131  
 132  
 133  
 134  
 135  
 136

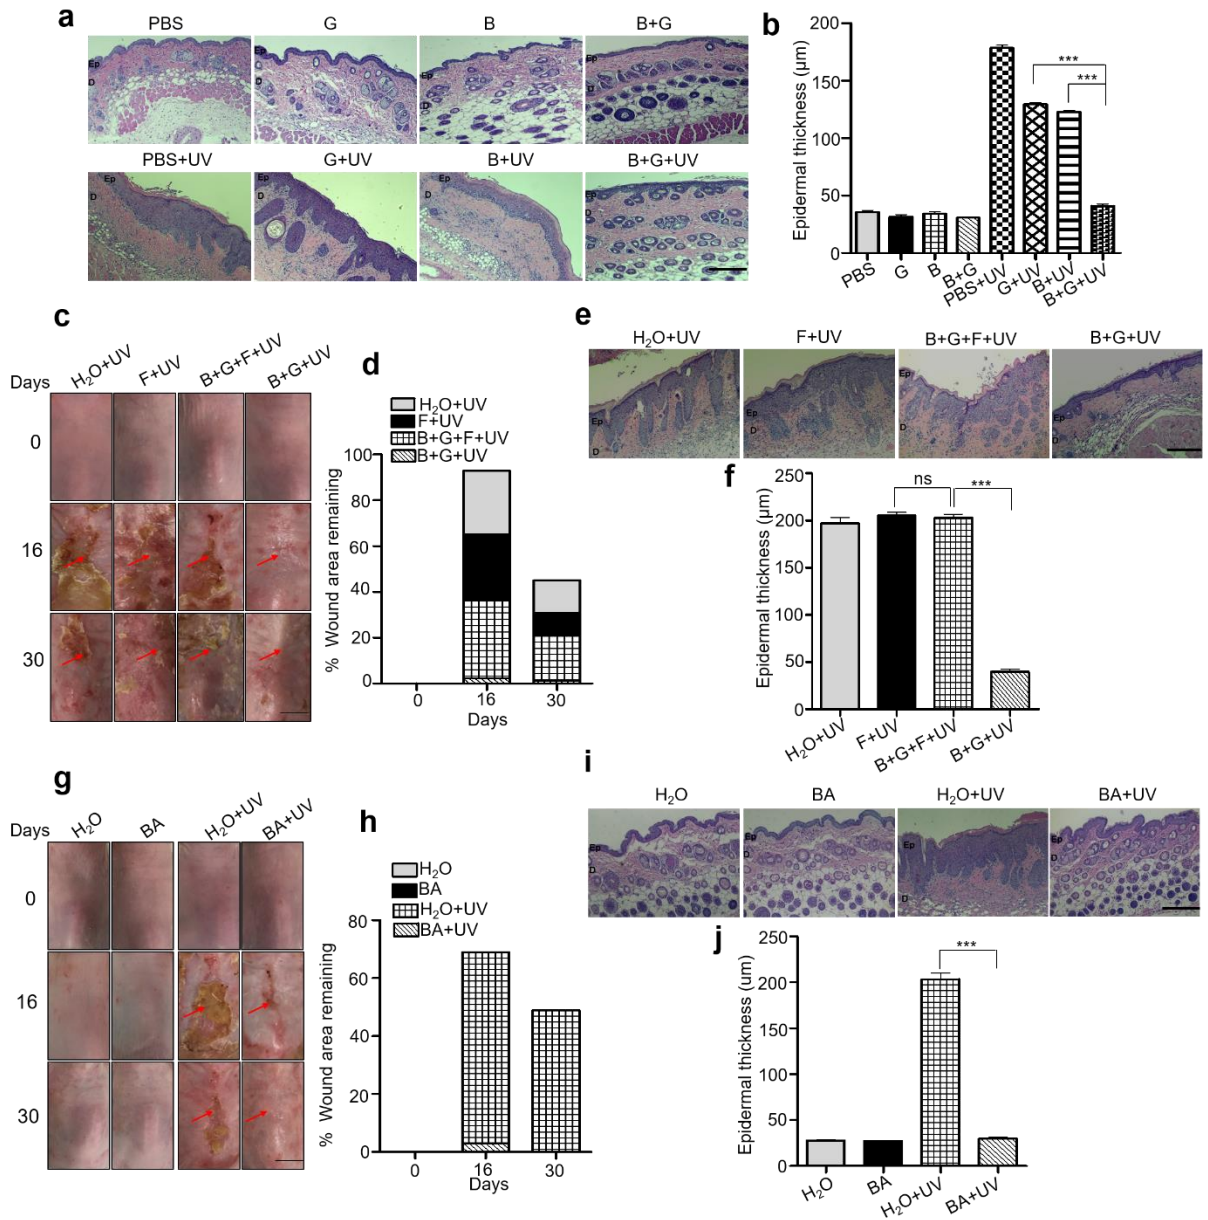

137 **Figure S3.** Attenuation of UVB-induced inflammation by application of a mixture of *S. epidermidis* and glycerol  
 138 and its fermentation metabolite, butyric acid by decreased epidermal hyperplasia and improved skin morphology.  
 139 (a) H&E staining (×100), showing epidermal thickness in different groups of skin topically applied with PBS,  
 140 glycerol (G) (2%), *S. epidermidis* bacteria (B) ( $10^7$  CFU/ml), or a mixture of *S. epidermidis* bacteria plus glycerol (B+G)  
 141 followed by exposure with UVB (195 mJ/cm<sup>2</sup>) irradiation from 30 d. Graph (b) from quantification of epidermal  
 142 thickness in μm in above groups of ICR mice skin were displayed. Bar = 100 μm. (c) Skin morphology of ICR mice  
 143 topically applied with H<sub>2</sub>O, Furfural (0.4%), mixture of *S. epidermidis* bacteria (B) (107 CFU/mL), glycerol (G), (2%)  
 144 and furfural (F) (0.4%) (B+G+F), and a mixture of *S. epidermidis* bacteria plus glycerol (B+G) followed by exposure  
 145 with UVB (195 mJ/cm<sup>2</sup>) irradiation were shown from 0, 16, and 30 d. Skin lesions or wound are indicated by red  
 146 arrows. Scale bar = 5 mm. Graph (d) indicates percent of remaining wound area to the total area of exposed skin  
 147 from all groups.(e) H&E staining (×100), showing epidermal thickness in skin from all groups. Graph (f) from  
 148 quantification of epidermal thickness in μm from H&E staining in all groups of skin were displayed. Bar = 100 μm.  
 149 (g) Skin morphology of ICR mice topically applied with H<sub>2</sub>O and butyric acid (BA) (4 mM) followed by exposure  
 150 with UVB (195 mJ/cm<sup>2</sup>) were shown from 0, 16, and 30 d. Skin lesions or wounds are indicated by red arrows. Scale

151 bar = 5 mm. Graph (h) indicates percent of remaining wound area to the total area of exposed skin. (i) H&E staining  
 152 ( $\times 100$ ), showing epidermal thickness in skin from all groups. Graph (j) indicates quantification of epidermal  
 153 thickness in  $\mu\text{m}$  from H&E staining in all groups of mice skin. Scale bar = 100  $\mu\text{m}$ . Data are the means of three  
 154 separate experiments using five mice per group. ns = non-significant. \*\*\*  $p < 0.001$ . (two-tailed t-tests).

155

156

157

158

159

160

161

162

164

165

166

167

168

169

170

171 **Figure S4.** Blocking FFAR2 prevents the butyric acid mediated amelioration of skin lesions and epidermal  
 172 thickness. (a) Skin morphology of ICR mice upon gavage feeding of FFAR2 antagonist GLPG0974 dissolved in  
 173 DMSO in saline (0.01%) and topically applied butyric acid (BA) (4mM) followed by UVB irradiation (195 mJ/cm<sup>2</sup>)  
 174 were displayed from 0, 16 and 30 d. Mice fed with DMSO in saline and topically applied with H<sub>2</sub>O, followed by  
 175 UVB exposure were included as control. Skin lesions or wound are indicated by red arrows. Scale bar = 5 mm.  
 176 Graph (b) indicates percent of remaining wound area to the total area of exposed skin from all groups. (c) H&E  
 177 staining ( $\times 100$ ), showing epidermal thickness in skin from all groups. Graph (d) from quantification of epidermal  
 178 thickness in  $\mu\text{m}$  from H & E staining in all groups of mice skin were displayed. Scale bar = 100  $\mu\text{m}$ . (e) Protein  
 179 expressions of FFAR2 and  $\beta$ -actin by western blot analysis in mice skin from all groups. (f) The expression of the  
 180 FFAR2 gene relative to the GAPDH gene by RTPCR analysis in mice skin from all groups. (g) Morphology of ICR  
 181 mice upon subcutaneous injection with FFAR2 siRNA 10 min prior to topical application with butyric acid (BA)  
 182 (4mM). Injection with scrambled or negative control siRNA and topically applied with H<sub>2</sub>O were included as  
 183 control. Skin lesions or wound were indicated by red arrows. Scale bar = 5 mm. Graph (h) indicates percent of  
 184 remaining wound area to the total area of exposed skin of mice from all groups. (i) H&E staining ( $\times 100$ ), showing  
 185 epidermal thickness in skin from all groups. Graph (j) from quantification of epidermal thickness in  $\mu\text{m}$  from H&E  
 186 staining in all groups of mice skin are displayed. Scale bar = 100  $\mu\text{m}$ . (k) protein expression of FFAR2 and  $\beta$ -actin  
 187 by western blot analysis in skin from all groups. (l) The expression of the FFAR2 gene relative to the GAPDH gene  
 188 by RTPCR analysis in mice skin from all groups. Data are the means of three separate experiments using five mice  
 189 per group. ns= non-significant. \*  $p < 0.01$ . (two-tailed t-tests).

190

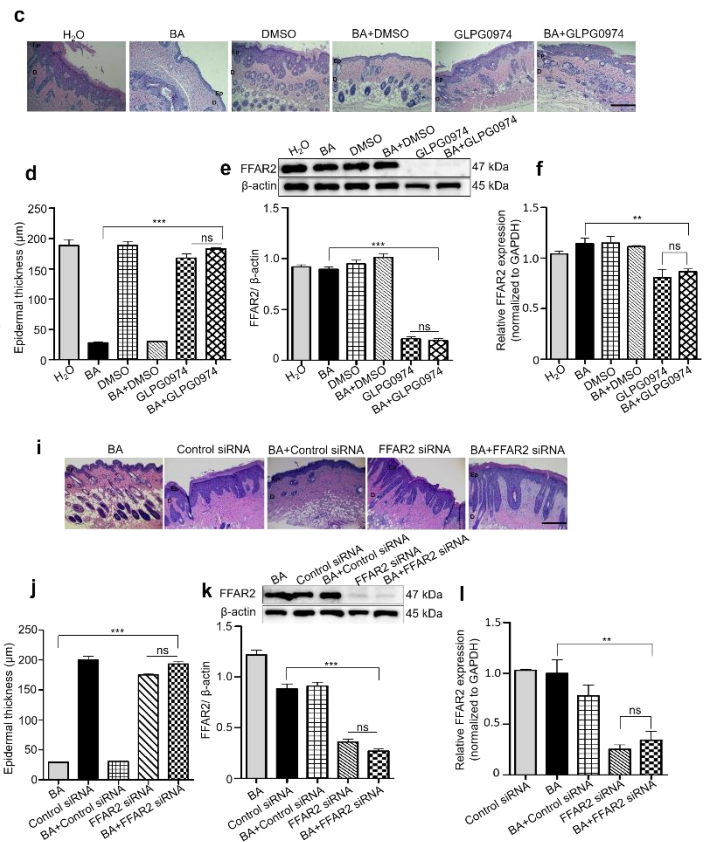

191

192
